# Supplementary figures and images for: Predictive Ki-67 Proliferation Index of Cervical Squamous Cell Carcinoma Based on IVIM-DWI Combined with Texture Features
Source: Hindawi journal article supplement (doi:10.1155/2021/8873065), 2021-01-16

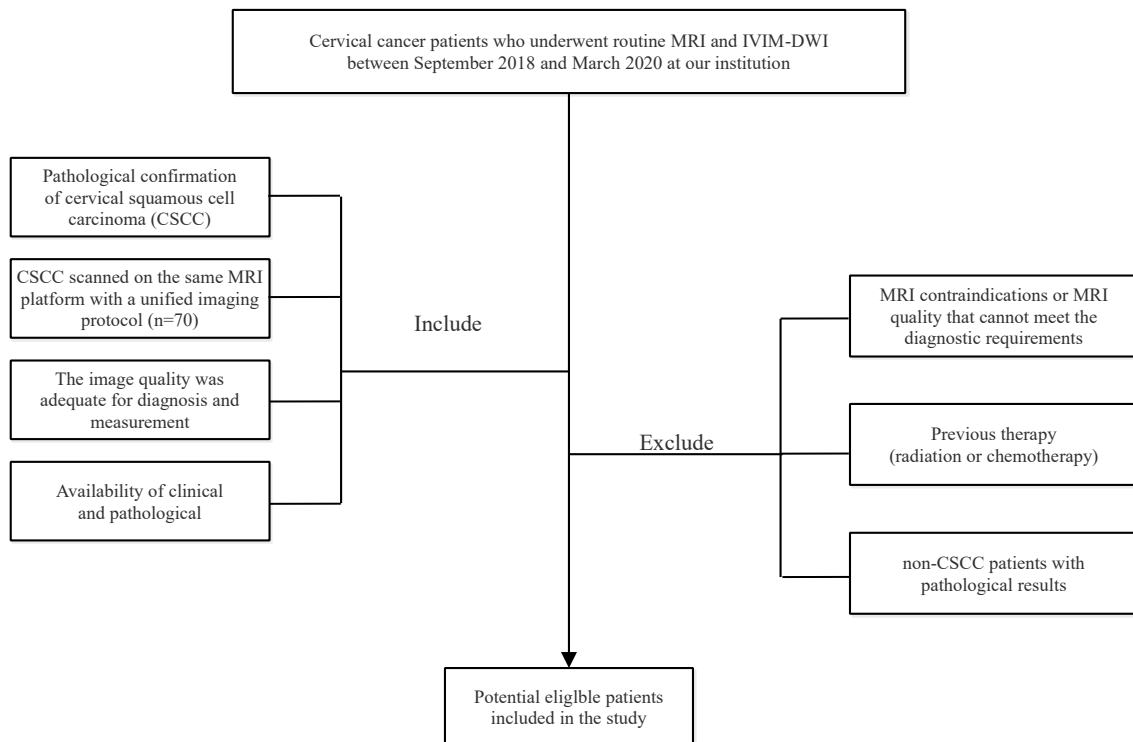

Supplement: f1 [file 8873065.f1.zip]
